# Supplementary material
Source: MDPI journal article supplement (https://www.mdpi.com/1999-4907/13/2/208)
Supplement: s1 [file s1]

## FORESTS – SUPPLEMENTARY MATERIALS

### Origin, persistence and vulnerability to climate changes of *Podocarpus* populations in Central African mountains

#### Authors:

Jérémy Migliore<sup>1,2,3\*</sup>, Anne-Marie Lézine<sup>2</sup>, Michel Veuille<sup>4,5</sup>, Gaston Achoundong<sup>6</sup>, Barthélémy Tchiengué<sup>6</sup>, Arthur F. Boom<sup>1</sup>, Franck K. Monthe<sup>1,7</sup>, Gaël U. D. Bouka<sup>8</sup>, Stephen F. Omondi<sup>9</sup>, Lawrence Wagura<sup>10</sup>, Francisco Maiato P. Gonçalves<sup>11,12</sup>, Tariq Stévant<sup>13,14,15</sup>, João N.M. Farminhão<sup>13</sup> & Olivier J. Hardy<sup>1</sup>

#### Addresses:

<sup>1</sup>Service Evolution Biologique et Ecologie, Faculté des Sciences, Université Libre de Bruxelles, 1050 Brussels, Belgium.

<sup>2</sup>Sorbonne Université, Laboratoire d'Océanographie et du Climat - Expérimentations et Approches Numériques (LOCEAN/IPSL), CNRS UMR 7159, Sorbonne Université, 75006 Paris, France.

<sup>3</sup>Muséum Départemental du Var, Jardin Départemental du Las, 737 Chemin du Jonquet, 83200 Toulon, France.

<sup>4</sup>Institut de Systématique, Évolution, Biodiversité (ISYEB), UMR 7205 - CNRS, MNHN, UPMCSU, EPHE, UA, Ecole Pratique des Hautes Etudes, Sorbonne Université, 75006 Paris, France.

<sup>5</sup>Ecole Pratique des Hautes Etudes (EPHE), Paris Sciences et Lettres University (PSL), Research University, 75006 Paris, France.

<sup>6</sup>Herbier National du Cameroun, Institut de Recherche Agricole pour le Développement, Yaoundé, Cameroon.

<sup>7</sup>Nature + asbl / TERRA Research Centre, Central African Forests, Gembloux Agro-Bio Tech, Université de Liège, 5030 Gembloux, Belgium.

<sup>8</sup>Laboratoire de Botanique et Ecologie, Faculty of Sciences and Techniques, Marien Ngouabi University, Brazzaville, Republic of the Congo.

<sup>9</sup>Forest Genetics and Tree Improvement, Kenya Forestry Research Institute, 20412-00200 Nairobi, Kenya.

<sup>10</sup>Natural Africa Concern, P.O. Box 28513, Nairobi, Kenya.

<sup>11</sup>Biocenter Klein Flottbek and Botanical Garden (BioZ Flottbek), University of Hamburg, 22609 Hamburg, Germany.

<sup>12</sup>Herbario do Lubango, ISCED-Huíla, Rua Sarmento Rodrigues S/N, Lubango, Angola.

<sup>13</sup>Herbarium et Bibliothèque de Botanique africaine, Université Libre de Bruxelles, Brussels, Belgium.

<sup>14</sup>Africa and Madagascar Department, Missouri Botanical Garden, St. Louis, , MO 63110, U.S.A.

<sup>15</sup>Botanic Garden Meise, 1860 Meise, Belgium.

#### <sup>1</sup>Corresponding author:

*[jmigliore@var.fr](mailto:jmigliore@var.fr)*

## TABLE OF CONTENTS

**Figure S1. Discriminant Analysis of Principal Components (DAPC) drawn across 229 samples of *Podocarpus latifolius* from western Central and East Africa using nine nuclear SSR markers.** X and Y axes of the DAPC scatterplots describe the first and second discriminant functions (a), the first and the third functions (b), and the second and the third functions (c). Barplots of Discriminant Analysis eigenvalues (top left in a-c) display the proportion of genetic information comprised in each consecutive discriminant function. Analysis eigenvalues graphs (bottom left) represent cumulated variance explained by the eigenvalues of the PCA. Populations sampled are distinguished by symbols and colours within with 95% inertia ellipses and mapped within the distribution range of *P. latifolius* (d).

**Figure S2. Analysis of genetic clustering (STRUCTURE results) of *Podocarpus latifolius* SSR data in western Central Africa.** Representation of the log-likelihood of the data  $Ln(P)$ ,  $\Delta K$  [33], measuring the increment in the probability of the data at each  $K$  (a-b). Distribution of the nSSR genetic clusters for  $K = 2, 3, 4, 5$ , and  $6$  (c-g), highlighting admixed samples with triangles when  $0.5 < q < 0.7$ , and asterisks when  $q < 0.5$ ;  $q$  designating the probability of clusters assignment. STRUCTURE graphs represent the membership coefficients ( $q$ ) of each individual using the  $K = 2$  and  $K = 6$  (h-i).

**Table S1. Characteristics of the nine nuclear microsatellite markers developed and used for *Podocarpus latifolius*.** The linkers (Q1, Q2, Q3, Q4) attached to the forward primers are underlined in the forward primer sequences.

**Table S2. Characteristics of samples of *Podocarpus latifolius* used for nuclear SSR genotyping.** For each sample ( $n = 270$ ), the following elements are provided: the DNA ID, the sampling location, the population ID, the GPS coordinates, the collection details, and their STRUCTURE clustering membership for  $K = 2, 3, 4, 5$ , and  $6$ . Individuals were considered as admixed (symbol 0) when their probability of assignment to a single gene pool was below  $0.5$  and an interrogation point indicates assignment values between  $0.5$  and  $0.7$ .

**Table S3. Results of ABC demographic inference for *P. latifolius* in Cameroon, using the software DIYABC:** prior and posterior distributions of the demographical and historical parameters (graphical representation in Figure 5). Times in year BP and effective sizes in number of individuals.

**Figure S1. Discriminant Analysis of Principal Components (DAPC) drawn across 229 samples of *Podocarpus latifolius* from western Central and East Africa using nine nuclear SSR markers.** X and Y axes of the DAPC scatterplots describe the first and second discriminant functions (a), the first and the third functions (b), and the second and the third functions (c). Barplots of Discriminant Analysis eigenvalues (top left in a-c) display the proportion of genetic information comprised in each consecutive discriminant function. Analysis eigenvalues graphs (bottom left) represent cumulated variance explained by the eigenvalues of the PCA. Populations sampled are distinguished by symbols and colours within with 95% inertia ellipses and mapped within the distribution range of *P. latifolius* (d).

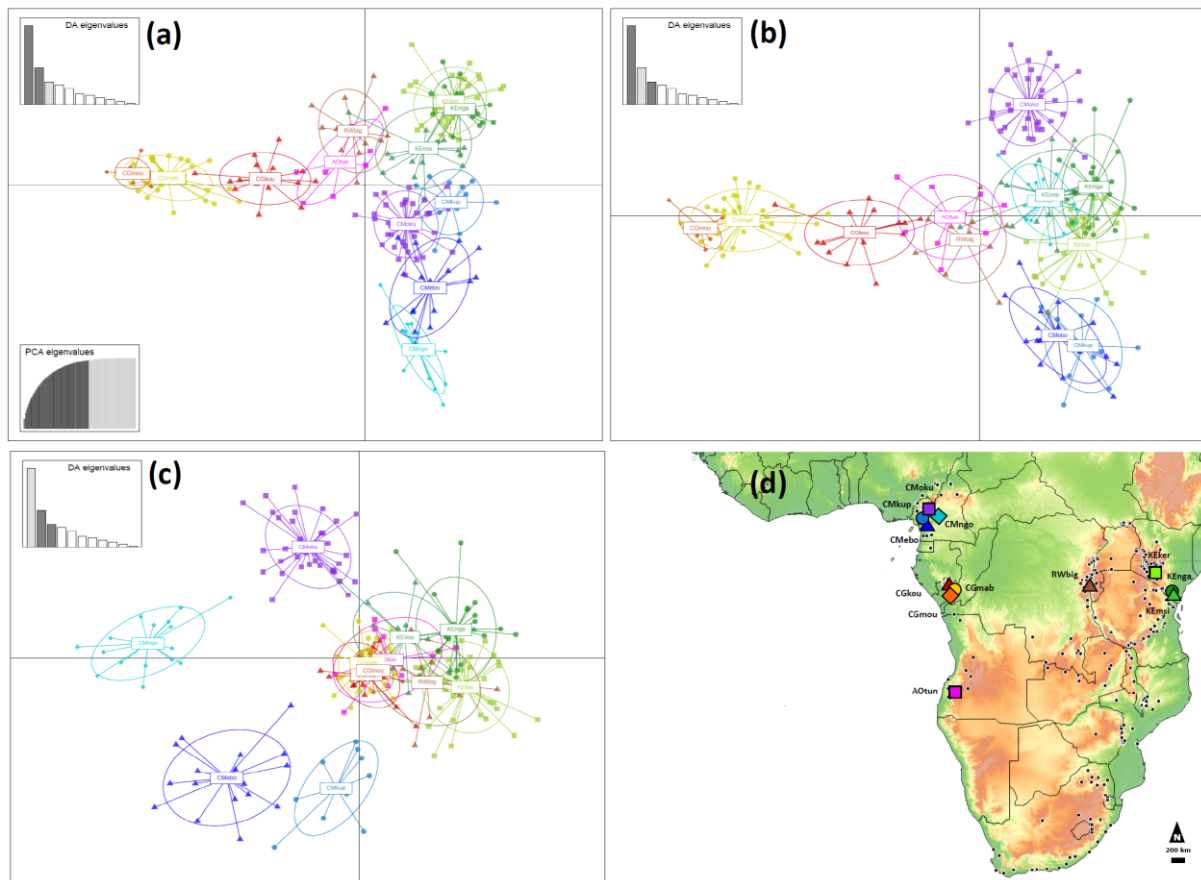

**Figure S2. Analysis of genetic clustering (STRUCTURE results) of *Podocarpus latifolius* SSR data in western Central Africa.** Representation of the log-likelihood of the data  $Ln(P)$ ,  $\Delta K$  [33], measuring the increment in the probability of the data at each  $K$  (a-b). Distribution of the nSSR genetic clusters for  $K = 2, 3, 4, 5$ , and  $6$  (c-g), highlighting admixed samples with triangles when  $0.5 < q < 0.7$ , and asterisks when  $q < 0.5$ ;  $q$  designating the probability of clusters assignment. STRUCTURE graphs represent the membership coefficients ( $q$ ) of each individual using the  $K = 2$  and  $K = 6$  (h-i).

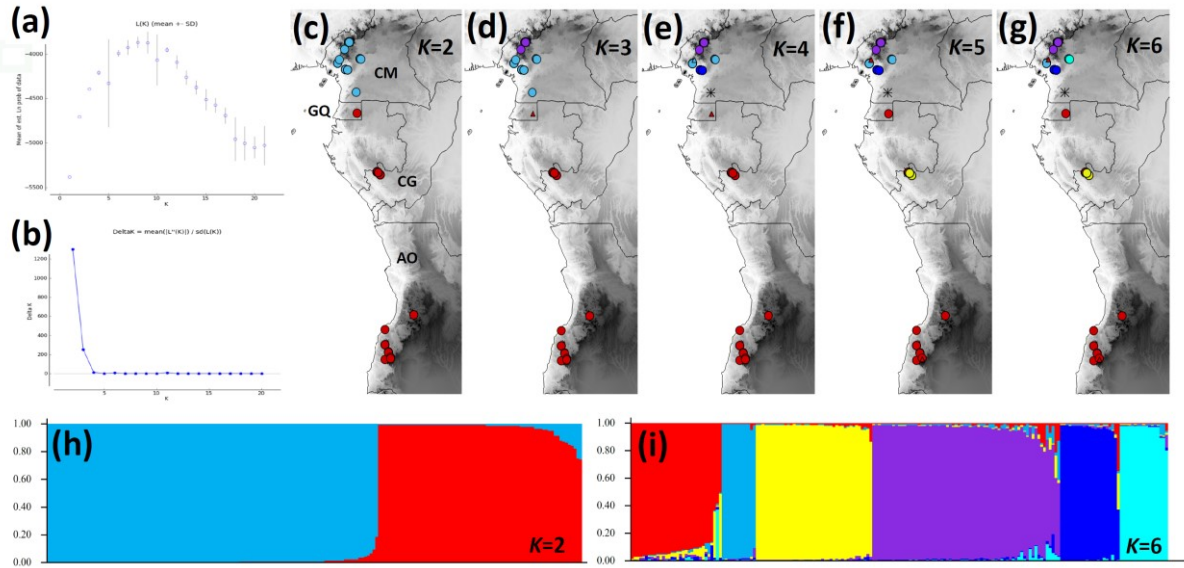

**Table S1. Characteristics of the nine nuclear microsatellite markers developed and used for *Podocarpus latifolius*.** The linkers (Q1, Q2, Q3, Q4) attached to the forward primers are underlined in the forward primer sequences.

| Locus               | Primer sequences (5'-3')                                                               | Fluorescent label | Repeat motif       | Allele size range (bp) | GenBank accession no. |
|---------------------|----------------------------------------------------------------------------------------|-------------------|--------------------|------------------------|-----------------------|
| <b>Multiplex 01</b> |                                                                                        |                   |                    |                        |                       |
| PodL-ssr07          | F: <u>TGTAAACGACGGCCAGT</u> TGCGGCTATATGTGTTACGTG<br>R: AACAGCATAACAAAGCATTCTG         | Q1-6FAM           | (AT) <sub>16</sub> | 166-206                | OM201662              |
| PodL-ssr12          | F: <u>TGTAAACGACGGCCAGT</u> TATTGTATTTGTACATCTTAGGCC<br>R: AGTTAGTAAGTATGGTCAACAAATCCC | Q1-6FAM           | (AT) <sub>17</sub> | 238-258                | OM201663              |
| PodL-ssr15          | F: <u>TAGGAGTGCAGCAAGCAT</u> GTGCATCATGAAACATGAAATTA<br>R: CAAACTATCTCAGTATTCCTTCACCA  | Q2-NED            | (AT) <sub>10</sub> | 155-171                | OM201664              |
| PodL-ssr25          | F: <u>CACTGCTTAGAGCGATGCT</u> GTGCACATGGAGGATACCGT<br>R: GGGATTTTCGAGGTTGTATTGA        | Q3-VIC            | (AT) <sub>9</sub>  | 136-158                | OM201665              |
| PodL-ssr35          | F: <u>CACTGCTTAGAGCGATGCT</u> GAATTTATGAATGAAGTGCTAGATG<br>R: CCAATTAATTAACCATTATCGCA  | Q3-VIC            | (AT) <sub>14</sub> | 203-227                | OM201666              |
| <b>Multiplex 02</b> |                                                                                        |                   |                    |                        |                       |
| PodL-ssr01          | F: <u>TGTAAACGACGGCCAGT</u> CACCTTCTCCTTTGGAATGTGC<br>R: CTTGCATGGATGACACATGA          | Q1-6FAM           | (AT) <sub>8</sub>  | 122-154                | OM201667              |
| PodL-ssr14          | F: <u>TAGGAGTGCAGCAAGCAT</u> TGAAACCCTAACCAACCTATCG<br>R: CATGGGTAGAAATAATTTCGCA       | Q2-NED            | (AG) <sub>13</sub> | 140-172                | OM201668              |
| PodL-ssr28          | F: <u>CACTGCTTAGAGCGATGCT</u> ATGGCGGATGTTGGAAACT<br>R: TCTTGAGTAATACTAGAAAGGAGGGC     | Q3-VIC            | (AAT) <sub>8</sub> | 159-171                | OM201669              |
| PodL-ssr42          | F: <u>CTAGTTATTGCTCAGCGGT</u> TGAAGTAATGTGTAAGGATAACTCAA<br>R: CCACTTTCTACCTTACAAGCCC  | Q4-PET            | (AT) <sub>10</sub> | 179-211                | OM201670              |

**Table S2. Characteristics of samples of *Podocarpus latifolius* used for nuclear SSR genotyping.** For each sample ( $n = 270$ ), the following elements are provided: the DNA ID, the sampling location, the population ID, the GPS coordinates, the collection details, and their STRUCTURE clustering membership for  $K = 2, 3, 4, 5$ , and 6. Individuals were considered as admixed (symbol 0) when their probability of assignment to a single gene pool was below 0.5 and an interrogation point indicates assignment values between 0.5 and 0.7.

| ID      | Country  | Population | Locality                          | Latitude    | Longitude   | Herbarium information | K2 Clusters | K3 Clusters | K4 Clusters | K5 Clusters | K6 Clusters |
|---------|----------|------------|-----------------------------------|-------------|-------------|-----------------------|-------------|-------------|-------------|-------------|-------------|
| ABo0672 | Angola   | AO         | Huila, Sa da Bandeira, Tundavala  | -14.842608  | 13.40668    | LISC 9446             | 2           | 3           | 2           | 3           | 1           |
| ABo0675 | Angola   | AO         | Tundavala, 6 km to Sa da Bandeira | -14.933333  | 13.4        | LISC 1174             | 2           | 3           | 2           | 3?          | 1?          |
| JM0864  | Angola   | AOTun      | Tundavala Gorge                   | -14,0083333 | 13.0038333  | 7975                  | 2           | 3           | 2           | 3           | 1           |
| JM0865  | Angola   | AOTun      | Gorge E of Leba Pass              | -15,006725  | 13.0023778  | 7975                  | 2           | 3           | 2           | 3           | 1           |
| JM0866  | Angola   | AOTun      | Tundavala Gorge                   | -14,0084389 | 13.0038139  | 7975                  | 2           | 3           | 2           | 3           | 1           |
| JM0867  | Angola   | AOTun      | Tundavala Gorge                   | -14,0084489 | 13.0038239  | 7975                  | 2           | 3           | 2           | 3           | 1           |
| JM0868  | Angola   | AO         | Serra da Neve                     | -13,0071889 | 13.0020556  | 7975                  | 2           | 3           | 2           | 3           | 1           |
| JM0869  | Angola   | AO         | Mount Moco                        | -12,0045072 | 15.0016028  | 7975                  | 2           | 3           | 2           | 3           | 1           |
| JM0870  | Angola   | AOTun      | Tundavala                         | -14.0084589 | 13.0038339  | 7975                  | 2           | 3           | 2           | 3           | 1           |
| JM0871  | Angola   | AOTun      | Tundavala rockies                 | -14,49859   | 13.23408    | /                     | 2           | 3           | 2           | 3           | 1           |
| JM0872  | Angola   | AOTun      | Tundavala rockies                 | -14,49959   | 13.23508    | /                     | 2           | 3           | 2           | 3           | 1           |
| JM0873  | Angola   | AOTun      | Tundavala waterfall               | -14,50558   | 13.24396    | /                     | 2           | 3           | 2           | 3           | 1           |
| JM0874  | Angola   | AOTun      | Tundavala waterfall               | -14,5059    | 13.24264    | /                     | 2           | 3           | 2           | 3           | 1           |
| CM0195  | Cameroon | CM         | Road Ebolowa-Kribi                | 2.845366667 | 10.98548333 | /                     | 1           | 1           | 0           | 0           | 0           |
| FM5191  | Cameroon | CMngo      | Mt Ngoro                          | 5.083689988 | 11.25483099 | /                     | 1           | 1           | 3           | 2           | 6           |
| FM5192  | Cameroon | CMngo      | Mt Ngoro                          | 5.083573982 | 11.25500601 | /                     | 1           | 1           | 3           | 2           | 6           |
| FM5193  | Cameroon | CMngo      | Mt Ngoro                          | 5.083586974 | 11.25497499 | /                     | 1           | 1           | 3           | 2           | 6           |
| FM5194  | Cameroon | CMngo      | Mt Ngoro                          | 5.083584962 | 11.25495697 | /                     | 1           | 1           | 3           | 2           | 6           |
| FM5195  | Cameroon | CMngo      | Mt Ngoro                          | 5.083553027 | 11.25505303 | /                     | 1           | 1           | 3           | 2           | 6           |
| FM5196  | Cameroon | CMngo      | Mt Ngoro                          | 5.083538024 | 11.25499402 | /                     | 1           | 1           | 3           | 2           | 6           |
| FM5197  | Cameroon | CMngo      | Mt Ngoro                          | 5.083495025 | 11.255047   | /                     | 1           | 1           | 3           | 2           | 6           |
| FM5198  | Cameroon | CMngo      | Mt Ngoro                          | 5.083524026 | 11.25505202 | /                     | 1           | 1           | 3           | 2           | 6           |
| FM5199  | Cameroon | CMngo      | Mt Ngoro                          | 5.083429981 | 11.25512503 | /                     | 1           | 1           | 3           | 2           | 6           |
| FM5200  | Cameroon | CMngo      | Mt Ngoro                          | 5.083446996 | 11.25523802 | /                     | 1           | 1           | 3           | 2           | 6           |
| FM5201  | Cameroon | CMngo      | Mt Ngoro                          | 5.083709015 | 11.25609004 | /                     | 1           | 1           | 3           | 2           | 6           |
| FM5202  | Cameroon | CMngo      | Mt Ngoro                          | 5.083703985 | 11.255997   | /                     | 1           | 1           | 3           | 2           | 6           |
| FM5203  | Cameroon | CMngo      | Mt Ngoro                          | 5.083724018 | 11.25609096 | /                     | 1           | 1           | 3           | 2           | 6           |
| FM5204  | Cameroon | CMngo      | Mt Ngoro                          | 5.08363802  | 11.25598501 | /                     | 1           | 1           | 3           | 2           | 6           |
| FM5205  | Cameroon | CMngo      | Mt Ngoro                          | 5.083646988 | 11.25651802 | /                     | 1           | 1           | 3           | 2           | 6           |
| FM5206  | Cameroon | CMngo      | Mt Ngoro                          | 5.083536012 | 11.25503501 | /                     | 1           | 1           | 3           | 2           | 6           |
| FM5243  | Cameroon | CMebo      | Ebo                               | 4.36431     | 10.24509    | /                     | 1           | 1           | 4           | 4           | 5           |
| FM5244  | Cameroon | CMebo      | Ebo                               | 4.36434     | 10.24506    | /                     | 1           | 1           | 4           | 4           | 5           |
| FM5245  | Cameroon | CMebo      | Ebo                               | 4.36433     | 10.24506    | /                     | 1           | 1           | 4           | 4           | 5           |
| FM5247  | Cameroon | CMebo      | Ebo                               | 4.36425     | 10.24509    | /                     | 1           | 1           | 4           | 4           | 5           |
| FM5248  | Cameroon | CMebo      | Ebo                               | 4.36427     | 10.24511    | /                     | 1           | 1           | 4           | 4           | 5           |

|        |          |       |                             |         |          |   |    |    |    |    |    |
|--------|----------|-------|-----------------------------|---------|----------|---|----|----|----|----|----|
| FM5250 | Cameroon | CMebo | Ebo                         | 4.36426 | 10.24517 | / | 1  | 1  | 4  | 4  | 5  |
| FM5252 | Cameroon | CMebo | Ebo                         | 4.36425 | 10.24522 | / | 1  | 1  | 4  | 4  | 5  |
| FM5253 | Cameroon | CMebo | Ebo                         | 4.36456 | 10.24515 | / | 1  | 1  | 4  | 4  | 5  |
| FM5254 | Cameroon | CMebo | Ebo                         | 4.36446 | 10.24511 | / | 1  | 1  | 4  | 4  | 5  |
| FM5255 | Cameroon | CMebo | Ebo                         | 4.36445 | 10.24514 | / | 1  | 1  | 4  | 4  | 5  |
| FM5256 | Cameroon | CMebo | Ebo                         | 4.36452 | 10.24512 | / | 1  | 1  | 4  | 4  | 5  |
| FM5258 | Cameroon | CMebo | Ebo                         | 4.36456 | 10.24506 | / | 1  | 1  | 4  | 4  | 5  |
| FM5259 | Cameroon | CMebo | Ebo                         | 4.36454 | 10.24504 | / | 1  | 1  | 4  | 4  | 5  |
| FM5261 | Cameroon | CMebo | Ebo                         | 4.36451 | 10.24505 | / | 1  | 1  | 4  | 4  | 5  |
| FM5262 | Cameroon | CMebo | Ebo                         | 4.36454 | 10.245   | / | 1  | 1  | 4  | 4  | 5  |
| FM5264 | Cameroon | CMebo | Ebo                         | 4.3644  | 10.24517 | / | 1  | 1  | 4  | 4  | 5  |
| FM5265 | Cameroon | CMebo | Ebo                         | 4.3644  | 10.245   | / | 1  | 1  | 4  | 4  | 5  |
| FM5246 | Cameroon | CMebo | Ebo                         | 4.36428 | 10.24501 | / | na | na | na | na | na |
| FM5249 | Cameroon | CMebo | Ebo                         | 4.36431 | 10.2452  | / | na | na | na | na | na |
| FM5251 | Cameroon | CMebo | Ebo                         | 4.36424 | 10.2452  | / | na | na | na | na | na |
| FM5257 | Cameroon | CMebo | Ebo                         | 4.36455 | 10.24508 | / | na | na | na | na | na |
| FM5260 | Cameroon | CMebo | Ebo                         | 4.36448 | 10.24507 | / | na | na | na | na | na |
| FM5263 | Cameroon | CMebo | Ebo                         | 4.36441 | 10.24508 | / | na | na | na | na | na |
| JM0882 | Cameroon | CM    | Lake Oku, close to the road | 6.20386 | 10.46034 | / | 1  | 2  | 1  | 5  | 4  |
| JM0884 | Cameroon | CM    | Lake Oku, close to the road | 6.20406 | 10.46024 | / | 1  | 2  | 1  | 5  | 4  |
| JM0885 | Cameroon | CM    | Lake Oku, close to the road | 6.2039  | 10.46033 | / | 1  | 2  | 1  | 5  | 4  |
| JM0886 | Cameroon | CM    | Lake Oku, close to the road | 6.20396 | 10.46034 | / | 1  | 2  | 1  | 5  | 4  |
| JM0887 | Cameroon | CM    | Lake Oku, close to the road | 6.20395 | 10.46037 | / | 1  | 2  | 1? | 5? | 4  |
| JM0888 | Cameroon | CM    | Lake Oku, close to the road | 6.20396 | 10.46038 | / | 1  | 2  | 1  | 5  | 4  |
| JM0890 | Cameroon | CM    | Lake Oku, close to the road | 6.204   | 10.46038 | / | 1  | 2  | 1  | 5  | 4  |
| JM0891 | Cameroon | CM    | Lake Oku, close to the road | 6.20402 | 10.46033 | / | 1  | 2  | 1  | 5  | 4  |
| JM0892 | Cameroon | CM    | Lake Oku, close to the road | 6.2041  | 10.46033 | / | 1  | 2? | 1? | 5? | 4? |
| JM0894 | Cameroon | CM    | Lake Oku, close to the road | 6.20406 | 10.46021 | / | 1  | 2  | 1  | 5  | 4  |
| JM0896 | Cameroon | CM    | Lake Oku, close to the road | 6.20403 | 10.46023 | / | 1  | 2  | 1  | 5  | 4  |
| JM0897 | Cameroon | CM    | Lake Oku, close to the road | 6.20403 | 10.46021 | / | 1  | 2  | 1  | 5  | 4  |
| JM0898 | Cameroon | CM    | Lake Oku, close to the road | 6.2041  | 10.46026 | / | 1  | 2  | 1  | 5  | 4  |
| JM0899 | Cameroon | CM    | Lake Oku, close to the road | 6.20413 | 10.46021 | / | 1  | 2  | 1  | 5  | 4  |
| JM0900 | Cameroon | CM    | Lake Oku, close to the road | 6.20413 | 10.4602  | / | 1  | 2  | 1  | 5  | 4  |
| JM0901 | Cameroon | CM    | Lake Oku, close to the road | 6.20421 | 10.46019 | / | 1  | 2  | 1  | 5  | 4  |
| JM0902 | Cameroon | CM    | Lake Oku, close to the road | 6.20419 | 10.46018 | / | 1  | 2  | 1  | 5  | 4  |
| JM0903 | Cameroon | CMoku | Mt Oku, river banks         | 6.21446 | 10.49783 | / | 1  | 2  | 1  | 5  | 4  |
| JM0904 | Cameroon | CMoku | Mt Oku, river banks         | 6.21439 | 10.49775 | / | 1  | 2  | 1  | 5  | 4  |
| JM0905 | Cameroon | CMoku | Mt Oku, river banks         | 6.21439 | 10.4979  | / | 1  | 2  | 1  | 5  | 4  |
| JM0907 | Cameroon | CMoku | Mt Oku, river banks         | 6.21438 | 10.49785 | / | 1  | 2  | 1  | 5  | 4  |
| JM0909 | Cameroon | CMoku | Mt Oku, river banks         | 6.21456 | 10.49806 | / | 1  | 2  | 1  | 5  | 4  |
| JM0911 | Cameroon | CMoku | Mt Oku, river banks         | 6.21469 | 10.49776 | / | 1  | 2  | 1  | 5  | 4  |
| JM0913 | Cameroon | CMoku | Mt Oku, river banks         | 6.21458 | 10.49759 | / | 1  | 2  | 1  | 5  | 4  |
| JM0915 | Cameroon | CMoku | Mt Oku, river banks         | 6.21455 | 10.49757 | / | 1  | 2  | 1  | 5  | 4  |
| JM0917 | Cameroon | CMoku | Mt Oku, river banks         | 6.2145  | 10.49755 | / | 1  | 2  | 1  | 5  | 4  |

|        |          |       |                                      |             |             |              |   |   |    |    |    |
|--------|----------|-------|--------------------------------------|-------------|-------------|--------------|---|---|----|----|----|
| JM0919 | Cameroon | CMoku | Mt Oku, river banks                  | 6.21445     | 10.49749    | /            | 1 | 2 | 1  | 5  | 4  |
| JM0921 | Cameroon | CMoku | Mt Oku, river banks                  | 6.21446     | 10.49787    | /            | 1 | 2 | 1  | 5  | 4  |
| JM0923 | Cameroon | CMoku | Mt Oku, river banks                  | 6.21423     | 10.49797    | /            | 1 | 2 | 1  | 5  | 4  |
| JM0925 | Cameroon | CMoku | Mt Oku, river banks                  | 6.21411     | 10.49816    | /            | 1 | 2 | 1  | 5  | 4  |
| JM0927 | Cameroon | CMoku | Mt Oku, river banks                  | 6.21399     | 10.49814    | /            | 1 | 2 | 1  | 5  | 4  |
| JM0929 | Cameroon | CMoku | Mt Oku, river banks                  | 6.21403     | 10.49816    | /            | 1 | 2 | 1  | 5  | 4  |
| JM0931 | Cameroon | CMoku | Mt Oku, river banks                  | 6.21394     | 10.49829    | /            | 1 | 2 | 1  | 5  | 4  |
| JM0933 | Cameroon | CMoku | Mt Oku, river banks                  | 6.21388     | 10.49826    | /            | 1 | 2 | 1  | 5  | 4  |
| JM0935 | Cameroon | CMoku | Mt Oku, river banks                  | 6.21405     | 10.49848    | /            | 1 | 2 | 1  | 5  | 4  |
| JM0937 | Cameroon | CMoku | Mt Oku, river banks                  | 6.21411     | 10.49851    | /            | 1 | 2 | 1  | 5  | 4  |
| JM0939 | Cameroon | CMoku | Mt Oku, river banks                  | 6.21426     | 10.49881    | /            | 1 | 2 | 1  | 5  | 4  |
| JM0942 | Cameroon | CMoku | Mt Oku, upper level                  | 6.2042      | 10.50279    | /            | 1 | 2 | 1  | 5  | 4  |
| JM0944 | Cameroon | CMoku | Mt Oku, upper level                  | 6.20405     | 10.50271    | /            | 1 | 2 | 1  | 5  | 4  |
| JM0946 | Cameroon | CMoku | Mt Oku, upper level                  | 6.204       | 10.50267    | /            | 1 | 2 | 1  | 5  | 4  |
| JM0948 | Cameroon | CMoku | Mt Oku, upper level                  | 6.20409     | 10.50279    | /            | 1 | 2 | 1  | 5  | 4  |
| JM0952 | Cameroon | CMoku | Mt Oku, upper level                  | 6.20413     | 10.50266    | /            | 1 | 2 | 1  | 5  | 4  |
| JM0956 | Cameroon | CMoku | Mt Oku, upper level                  | 6.20389     | 10.50272    | /            | 1 | 2 | 1  | 5  | 4  |
| JM0960 | Cameroon | CMoku | Mt Oku, upper level                  | 6.20363     | 10.50283    | /            | 1 | 2 | 1  | 5  | 4  |
| JM0962 | Cameroon | CMoku | Mt Oku, upper level                  | 6.20422     | 10.50306    | /            | 1 | 2 | 1  | 5  | 4  |
| JM0964 | Cameroon | CMoku | Mt Oku, upper level                  | 6.20437     | 10.50324    | /            | 1 | 2 | 1  | 5  | 4  |
| JM0968 | Cameroon | CMoku | Mt Oku, upper level                  | 6.20467     | 10.50307    | /            | 1 | 2 | 1  | 5  | 4  |
| JM0972 | Cameroon | CMoku | Mt Oku, upper level                  | 6.20477     | 10.50293    | /            | 1 | 2 | 1  | 5  | 4  |
| JM0976 | Cameroon | CMoku | Mt Oku, upper level                  | 6.20476     | 10.50279    | /            | 1 | 2 | 1  | 5  | 4  |
| JM0980 | Cameroon | CMoku | Mt Oku, upper level                  | 6.20472     | 10.50252    | /            | 1 | 2 | 1  | 5  | 4  |
| JM0982 | Cameroon | CMoku | Mt Oku, upper level                  | 6.20447     | 10.50272    | /            | 1 | 2 | 1  | 5  | 4  |
| JM0984 | Cameroon | CMoku | Mt Oku, upper level                  | 6.20444     | 10.50264    | /            | 1 | 2 | 1  | 5  | 4  |
| JM0987 | Cameroon | CMoku | Mt Oku, upper level                  | 6.2044      | 10.5028     | /            | 1 | 2 | 1  | 5  | 4  |
| JM0990 | Cameroon | CMoku | Mt Oku, upper level                  | 6.20431     | 10.50285    | /            | 1 | 2 | 1  | 5  | 4  |
| JM1182 | Cameroon | CM    | Babadjou, Mt Santa                   | 5.714179    | 10.183247   | P 01585186   | 1 | 2 | 1  | 5  | 4  |
| JM1184 | Cameroon | CM    | Mt Golep (Mt Ngoro)                  | 5.056925    | 11.304015   | P 01585224   | 1 | 1 | 3  | 2  | 6  |
| JM1192 | Cameroon | CM    | Mt Manengouba, Mueba, 7 km S. Bangem | 5.031149    | 9.829702    | P 01585238   | 1 | 1 | 3? | 3? | 1? |
| JM1220 | Cameroon | CM    | Lake Oku                             | 6.196883    | 10.460767   | BRLU 0013110 | 1 | 2 | 1? | 5? | 4? |
| JM1221 | Cameroon | CM    | Mt Oku                               | 6.221833    | 10.5301     | BRLU 0013109 | 1 | 2 | 1  | 5  | 4  |
| JM1231 | Cameroon | CM    | Ebo                                  | 4.35129     | 10.39534    | BRLU 0012841 | 1 | 1 | 4  | 4  | 5  |
| JM1233 | Cameroon | CM    | Mt Oku                               | 6.200139    | 10.501917   | /            | 1 | 2 | 1  | 5  | 4  |
| MV0001 | Cameroon | CMkup | Mt Kupé                              | 4.80905     | 9.704633333 | /            | 1 | 1 | 3  | 2  | 2  |
| MV0002 | Cameroon | CMkup | Mt Kupé                              | 4.803066667 | 9.701133333 | /            | 1 | 1 | 3  | 2  | 2  |
| MV0003 | Cameroon | CMkup | Mt Kupé                              | 4.8027      | 9.702133333 | /            | 1 | 1 | 3  | 2  | 2  |
| MV0004 | Cameroon | CMkup | Mt Kupé                              | 4.80255     | 9.7014      | /            | 1 | 1 | 3  | 2  | 2  |
| MV0005 | Cameroon | CMkup | Mt Kupé                              | 4.802516667 | 9.7014      | /            | 1 | 1 | 3  | 2  | 2  |



|         |                   |       |                                     |             |             |                 |    |    |    |    |    |
|---------|-------------------|-------|-------------------------------------|-------------|-------------|-----------------|----|----|----|----|----|
| MV0006  | Cameroon          | CMkup | Mt Kupé                             | 4.8026      | 9.701433333 | /               | 1  | 1  | 3  | 2  | 2  |
| MV0007  | Cameroon          | CMkup | Mt Kupé                             | 4.802683333 | 9.702683333 | /               | 1  | 1  | 3  | 2  | 2  |
| MV0008  | Cameroon          | CMkup | Mt Kupé                             | 4.802733333 | 9.701366667 | /               | 1  | 1  | 3  | 2  | 2  |
| MV0009  | Cameroon          | CMkup | Mt Kupé                             | 4.80295     | 9.701133333 | /               | 1  | 1  | 3  | 2  | 2  |
| MV0010  | Cameroon          | CMkup | Mt Kupé                             | 4.803033333 | 9.7011      | /               | 1  | 1  | 3  | 2  | 2  |
| MV0011  | Cameroon          | CMkup | Mt Kupé                             | 4.803033333 | 9.7012      | /               | 1  | 1  | 3  | 2  | 2  |
| MV0012  | Cameroon          | CMkup | Mt Kupé                             | 4.803033333 | 9.7013      | /               | 1  | 1  | 3  | 2  | 2  |
| OH5523  | Cameroon          | CM    | Ebo forest (Locndeng)               | 4.3508      | 10.396117   | /               | 1  | 1  | 4  | 4  | 5  |
| OH5524  | Cameroon          | CM    | Ebo forest (Locndeng)               | 4.3513      | 10.395333   | /               | 1  | 1  | 4  | 4  | 5  |
| SVO0973 | Cameroon          | CM    | Mt Oku                              | 6.218055556 | 10.51666667 | /               | 1  | 2  | 1  | 5  | 4  |
| SVO0974 | Cameroon          | CM    | Mt Oku                              | 6.218055556 | 10.51666667 | /               | 1  | 2? | 1? | 5? | 4? |
| SVO0975 | Cameroon          | CM    | Mt Oku                              | 6.218055556 | 10.51666667 | /               | 1  | 2  | 1  | 5  | 4  |
| SVO0979 | Cameroon          | CM    | Mt Oku                              | 6.2215      | 10.52763    | /               | 1  | 2  | 1  | 5  | 4  |
| SVO0980 | Cameroon          | CM    | Mt Oku                              | 6.2225      | 10.52715    | /               | 1  | 2  | 1  | 5  | 4  |
| SVO0986 | Cameroon          | CM    | Lake Oku                            | 6.20425     | 10.46031    | /               | 1  | 2  | 1  | 5  | 4  |
| SVO0987 | Cameroon          | CM    | Lake Oku                            | 6.20425     | 10.46031    | /               | 1  | 2  | 1  | 5  | 4  |
| SVO0988 | Cameroon          | CM    | Lake Oku                            | 6.20425     | 10.46031    | /               | 1  | 2  | 1  | 5  | 4  |
| JM1222  | Equatorial Guinea | GN    | Inselberg de Piedra Nzaz            | 1.45        | 11.033333   | BRLU<br>0013113 | 2  | 3? | 2? | 3  | 1  |
| JM1043  | Kenya             | KEnga | Taita Hills, Ngangao forest (South) | -3.36982196 | 38.34150304 | /               | na | na | na | na | na |
| JM1051  | Kenya             | KEnga | Taita Hills, Ngangao forest (South) | -3.36768399 | 38.34186204 | /               | na | na | na | na | na |
| JM1053  | Kenya             | KEnga | Taita Hills, Ngangao forest (South) | -3.36764803 | 38.34177696 | /               | na | na | na | na | na |
| JM1056  | Kenya             | KEnga | Taita Hills, Ngangao forest (South) | -3.36757    | 38.34148502 | /               | na | na | na | na | na |
| JM1058  | Kenya             | KEnga | Taita Hills, Ngangao forest (South) | -3.367312   | 38.34156599 | /               | na | na | na | na | na |
| JM1061  | Kenya             | KEnga | Taita Hills, Ngangao forest (South) | -3.36601901 | 38.34159801 | /               | na | na | na | na | na |
| JM1064  | Kenya             | KEnga | Taita Hills, Ngangao forest (South) | -3.36571198 | 38.34148401 | /               | na | na | na | na | na |
| JM1066  | Kenya             | KEnga | Taita Hills, Ngangao forest (South) | -3.364622   | 38.34093098 | /               | na | na | na | na | na |
| JM1068  | Kenya             | KEnga | Taita Hills, Ngangao forest (South) | -3.36421799 | 38.34080198 | /               | na | na | na | na | na |
| JM1070  | Kenya             | KEnga | Taita Hills, Ngangao forest (South) | -3.36582698 | 38.34113197 | /               | na | na | na | na | na |
| JM1071  | Kenya             | KEnga | Taita Hills, Ngangao forest (South) | -3.36648697 | 38.34072696 | /               | na | na | na | na | na |
| JM1072  | Kenya             | KEnga | Taita Hills, Ngangao forest (North) | -3.35435702 | 38.33821901 | /               | na | na | na | na | na |
| JM1073  | Kenya             | KEnga | Taita Hills, Ngangao forest (North) | -3.35430899 | 38.33822999 | /               | na | na | na | na | na |
| JM1074  | Kenya             | KEnga | Taita Hills, Ngangao forest (North) | -3.35440303 | 38.33822496 | /               | na | na | na | na | na |
| JM1075  | Kenya             | KEnga | Taita Hills, Ngangao forest (North) | -3.35440898 | 38.33826302 | /               | na | na | na | na | na |
| JM1076  | Kenya             | KEnga | Taita Hills, Ngangao forest (North) | -3.35482397 | 38.338865   | /               | na | na | na | na | na |
| JM1077  | Kenya             | KEnga | Taita Hills, Ngangao forest (North) | -3.35478399 | 38.33890004 | /               | na | na | na | na | na |
| JM1078  | Kenya             | KEnga | Taita Hills, Ngangao forest (North) | -3.35504098 | 38.33889199 | /               | na | na | na | na | na |
| JM1079  | Kenya             | KEnga | Taita Hills, Ngangao forest (North) | -3.35514299 | 38.33894304 | /               | na | na | na | na | na |
| JM1080  | Kenya             | KEnga | Taita Hills, Ngangao forest (North) | -3.35523804 | 38.33900096 | /               | na | na | na | na | na |
| JM1081  | Kenya             | KEnga | Taita Hills, Ngangao forest (North) | -3.35537299 | 38.33901797 | /               | na | na | na | na | na |
| JM1082  | Kenya             | KEnga | Taita Hills, Ngangao forest (North) | -3.35555697 | 38.33900297 | /               | na | na | na | na | na |
| JM1083  | Kenya             | KEmsi | Taita Hills, Msidunyi forest        | -3.40154998 | 38.30203601 | /               | na | na | na | na | na |
| JM1084  | Kenya             | KEmsi | Taita Hills, Msidunyi forest        | -3.40223403 | 38.302048   | /               | na | na | na | na | na |
| JM1085  | Kenya             | KEmsi | Taita Hills, Msidunyi forest        | -3.40282403 | 38.30115901 | /               | na | na | na | na | na |

|         |       |       |                              |             |             |   |    |    |    |    |    |
|---------|-------|-------|------------------------------|-------------|-------------|---|----|----|----|----|----|
| JM1087  | Kenya | KEmsi | Taita Hills, Msidunyi forest | -3.40261004 | 38.30149597 | / | na | na | na | na | na |
| JM1089  | Kenya | KEmsi | Taita Hills, Msidunyi forest | -3.40255598 | 38.30085601 | / | na | na | na | na | na |
| JM1090  | Kenya | KEmsi | Taita Hills, Msidunyi forest | -3.40233704 | 38.30073103 | / | na | na | na | na | na |
| JM1091  | Kenya | KEmsi | Taita Hills, Msidunyi forest | -3.40236101 | 38.30068502 | / | na | na | na | na | na |
| JM1093  | Kenya | KEmsi | Taita Hills, Msidunyi forest | -3.40295998 | 38.300265   | / | na | na | na | na | na |
| JM1094  | Kenya | KEmsi | Taita Hills, Msidunyi forest | -3.40304498 | 38.30064001 | / | na | na | na | na | na |
| JM1095  | Kenya | KEmsi | Taita Hills, Msidunyi forest | -3.40378501 | 38.30029199 | / | na | na | na | na | na |
| JM1096  | Kenya | KEmsi | Taita Hills, Msidunyi forest | -3.40371503 | 38.30024002 | / | na | na | na | na | na |
| JM1097  | Kenya | KEmsi | Taita Hills, Msidunyi forest | -3.40364303 | 38.29982403 | / | na | na | na | na | na |
| JM1098  | Kenya | KEmsi | Taita Hills, Msidunyi forest | -3.403639   | 38.29975697 | / | na | na | na | na | na |
| JM1099  | Kenya | KEmsi | Taita Hills, Msidunyi forest | -3.40475002 | 38.29964499 | / | na | na | na | na | na |
| JM1100  | Kenya | KEmsi | Taita Hills, Msidunyi forest | -3.40521304 | 38.30006501 | / | na | na | na | na | na |
| JM1102  | Kenya | KEmsi | Taita Hills, Msidunyi forest | -3.40408701 | 38.30091502 | / | na | na | na | na | na |
| JM1105  | Kenya | KEker | Gatamaiyo forest (Kereita)   | -0.97057502 | 36.69498403 | / | na | na | na | na | na |
| JM1106  | Kenya | KEker | Gatamaiyo forest (Kereita)   | -0.96957397 | 36.69426503 | / | na | na | na | na | na |
| JM1107  | Kenya | KEker | Gatamaiyo forest (Kereita)   | -0.969192   | 36.693211   | / | na | na | na | na | na |
| JM1110  | Kenya | KEker | Gatamaiyo forest (Kereita)   | -0.96851902 | 36.69308301 | / | na | na | na | na | na |
| JM1112  | Kenya | KEker | Gatamaiyo forest (Kereita)   | -0.96889696 | 36.69293499 | / | na | na | na | na | na |
| JM1114  | Kenya | KEker | Gatamaiyo forest (Kereita)   | -0.96814603 | 36.692233   | / | na | na | na | na | na |
| JM1116  | Kenya | KEker | Gatamaiyo forest (Kereita)   | -0.96721597 | 36.69146698 | / | na | na | na | na | na |
| JM1118  | Kenya | KEker | Gatamaiyo forest (Kereita)   | -0.96730398 | 36.69154099 | / | na | na | na | na | na |
| JM1122  | Kenya | KEker | Gatamaiyo forest (Kereita)   | -0.96784    | 36.69145701 | / | na | na | na | na | na |
| JM1124  | Kenya | KEker | Gatamaiyo forest (Kereita)   | -0.96808802 | 36.69085904 | / | na | na | na | na | na |
| JM1126  | Kenya | KEker | Gatamaiyo forest (Kereita)   | -0.96811401 | 36.69067204 | / | na | na | na | na | na |
| JM1128  | Kenya | KEker | Gatamaiyo forest (Kereita)   | -0.96835599 | 36.68998598 | / | na | na | na | na | na |
| JM1130  | Kenya | KEker | Gatamaiyo forest (Kereita)   | -0.96767697 | 36.68995396 | / | na | na | na | na | na |
| JM1132  | Kenya | KEker | Gatamaiyo forest (Kereita)   | -0.96709996 | 36.68650196 | / | na | na | na | na | na |
| JM1134  | Kenya | KEker | Gatamaiyo forest (Kereita)   | -0.96711304 | 36.68635603 | / | na | na | na | na | na |
| JM1136  | Kenya | KEker | Gatamaiyo forest (Kereita)   | -0.96691104 | 36.68624899 | / | na | na | na | na | na |
| JM1138  | Kenya | KEker | Gatamaiyo forest (Kereita)   | -0.96690802 | 36.68652501 | / | na | na | na | na | na |
| JM1140  | Kenya | KEker | Gatamaiyo forest (Kereita)   | -0.96698002 | 36.68651604 | / | na | na | na | na | na |
| JM1142  | Kenya | KEker | Gatamaiyo forest (Kereita)   | -0.96657199 | 36.686941   | / | na | na | na | na | na |
| JM1144  | Kenya | KEker | Gatamaiyo forest (Kereita)   | -0.96301404 | 36.68591598 | / | na | na | na | na | na |
| JM1146  | Kenya | KEker | Gatamaiyo forest (Kereita)   | -0.96291798 | 36.68585001 | / | na | na | na | na | na |
| JM1147B | Kenya | KEker | Gatamaiyo forest (Kereita)   | -0.96278002 | 36.68603098 | / | na | na | na | na | na |
| JM1149  | Kenya | KEker | Gatamaiyo forest (Kereita)   | -0.96171401 | 36.687688   | / | na | na | na | na | na |
| JM1152  | Kenya | KEker | Gatamaiyo forest (Kereita)   | -0.96050701 | 36.68559998 | / | na | na | na | na | na |
| JM1155  | Kenya | KEker | Gatamaiyo forest (Kereita)   | -0.96007903 | 36.685028   | / | na | na | na | na | na |
| JM1158  | Kenya | KEker | Gatamaiyo forest (Kereita)   | -0.96201802 | 36.68870104 | / | na | na | na | na | na |
| JM1161  | Kenya | KEker | Gatamaiyo forest (Kereita)   | -0.96314698 | 36.68990803 | / | na | na | na | na | na |
| JM1163  | Kenya | KEker | Gatamaiyo forest (Kereita)   | -0.96373304 | 36.69082099 | / | na | na | na | na | na |
| JM1166  | Kenya | KEker | Gatamaiyo forest (Kereita)   | -0.965697   | 36.69190602 | / | na | na | na | na | na |
| JM1169  | Kenya | KEker | Gatamaiyo forest (Kereita)   | -0.96674801 | 36.69317496 | / | na | na | na | na | na |
| JM1171  | Kenya | KEker | Gatamaiyo forest (Kereita)   | -0.96738604 | 36.69413703 | / | na | na | na | na | na |

|        |                       |       |                                    |             |             |   |    |    |    |    |    |
|--------|-----------------------|-------|------------------------------------|-------------|-------------|---|----|----|----|----|----|
| JM1173 | Kenya                 | KEker | Gatamaiyo forest (Kereita)         | -0.96905001 | 36.694648   | / | na | na | na | na | na |
| OH6036 | Republic of the Congo | CGkou | Chaillu Congolais - savannah Kouyi | -2.48022401 | 12.42652902 | / | 2  | 3  | 2  | 3  | 1  |
| OH6037 | Republic of the Congo | CG    | Chaillu Congolais - savannah Kouyi | -2.48022401 | 12.42652902 | / | 2  | 3  | 2  | 3  | 1  |
| OH6039 | Republic of the Congo | CGkou | Chaillu Congolais - savannah Kouyi | -2.46631198 | 12.43077102 | / | 2  | 3  | 2  | 3  | 1  |
| OH6041 | Republic of the Congo | CGkou | Chaillu Congolais - savannah Kouyi | -2.45855302 | 12.43352196 | / | 2  | 3  | 2  | 3  | 1  |
| OH6042 | Republic of the Congo | CGkou | Chaillu Congolais - savannah Kouyi | -2.45863298 | 12.43360503 | / | 2  | 3  | 2  | 3  | 1  |
| OH6044 | Republic of the Congo | CGkou | Chaillu Congolais - savannah Kouyi | -2.45855897 | 12.43364702 | / | 2  | 3  | 2  | 0  | 1? |
| OH6046 | Republic of the Congo | CGkou | Chaillu Congolais - savannah Kouyi | -2.45863097 | 12.43375297 | / | 2  | 3  | 2  | 3  | 1  |
| OH6047 | Republic of the Congo | CGkou | Chaillu Congolais - savannah Kouyi | -2.458824   | 12.43350696 | / | 2  | 3  | 2  | 3  | 1  |
| OH6049 | Republic of the Congo | CGkou | Chaillu Congolais - savannah Kouyi | -2.45897303 | 12.43350897 | / | 2  | 3  | 2  | 3  | 1  |
| OH6051 | Republic of the Congo | CGkou | Chaillu Congolais - savannah Kouyi | -2.45911201 | 12.43365498 | / | 2  | 3  | 2  | 3  | 1  |
| OH6053 | Republic of the Congo | CGkou | Chaillu Congolais - savannah Kouyi | -2.45970402 | 12.43515098 | / | 2  | 3  | 2  | 3  | 1  |
| OH6054 | Republic of the Congo | CGkou | Chaillu Congolais - savannah Kouyi | -2.45993502 | 12.43537797 | / | 2  | 3  | 2  | 3  | 1  |
| OH6055 | Republic of the Congo | CGkou | Chaillu Congolais - savannah Kouyi | -2.46011004 | 12.435528   | / | 2  | 3? | 2? | 3  | 1  |
| OH6057 | Republic of the Congo | CGkou | Chaillu Congolais - savannah Kouyi | -2.45772497 | 12.43410501 | / | 2  | 3  | 2  | 3  | 1  |
| OH6059 | Republic of the Congo | CGkou | Chaillu Congolais - savannah Kouyi | -2.45753202 | 12.43391298 | / | 2  | 3  | 2  | 3  | 1  |
| OH6061 | Republic of the Congo | CGkou | Chaillu Congolais - savannah Kouyi | -2.45897597 | 12.43248504 | / | 2  | 3  | 2  | 3  | 1  |
| OH6063 | Republic of the Congo | CGkou | Chaillu Congolais - savannah Kouyi | -2.46337404 | 12.44028004 | / | 2  | 3  | 2  | 3  | 1  |
| OH6035 | Republic of the Congo | CGkou | Chaillu Congolais - savannah Kouyi | -2.48163703 | 12.427672   | / | na | na | na | na | na |
| OH6038 | Republic of the Congo | CGkou | Chaillu Congolais - savannah Kouyi | -2.466518   | 12.430932   | / | na | na | na | na | na |
| OH6040 | Republic of the Congo | CGkou | Chaillu Congolais - savannah Kouyi | -2.46537798 | 12.430383   | / | na | na | na | na | na |
| OH6043 | Republic of the Congo | CGkou | Chaillu Congolais - savannah Kouyi | -2.45864103 | 12.433637   | / | na | na | na | na | na |
| OH6045 | Republic of the Congo | CGkou | Chaillu Congolais - savannah Kouyi | -2.45855201 | 12.433697   | / | na | na | na | na | na |

|        |                       |       |                                          |             |             |   |    |    |    |    |    |
|--------|-----------------------|-------|------------------------------------------|-------------|-------------|---|----|----|----|----|----|
| OH6048 | Republic of the Congo | CGkou | Chaillu Congolais - savannah Kouyi       | -2.45872401 | 12.433426   | / | na | na | na | na | na |
| OH6050 | Republic of the Congo | CGkou | Chaillu Congolais - savannah Kouyi       | -2.45900203 | 12.433412   | / | na | na | na | na | na |
| OH6052 | Republic of the Congo | CGkou | Chaillu Congolais - savannah Kouyi       | -2.45972204 | 12.434904   | / | na | na | na | na | na |
| OH6056 | Republic of the Congo | CGkou | Chaillu Congolais - savannah Kouyi       | -2.45852804 | 12.434565   | / | na | na | na | na | na |
| OH6058 | Republic of the Congo | CGkou | Chaillu Congolais - savannah Kouyi       | -2.45753503 | 12.433993   | / | na | na | na | na | na |
| OH6060 | Republic of the Congo | CGkou | Chaillu Congolais - savannah Kouyi       | -2.457687   | 12.433953   | / | na | na | na | na | na |
| OH6062 | Republic of the Congo | CGkou | Chaillu Congolais - savannah Kouyi       | -2.46353597 | 12.439057   | / | na | na | na | na | na |
| OH6065 | Republic of the Congo | CGmab | Chaillu Congolais - savannah Maba Moubou | -2.51914596 | 12.53177698 | / | 2  | 3  | 2  | 1  | 3  |
| OH6068 | Republic of the Congo | CGmab | Chaillu Congolais - savannah Maba Moubou | -2.51901797 | 12.53171797 | / | 2  | 3  | 2  | 1  | 3  |
| OH6071 | Republic of the Congo | CGmab | Chaillu Congolais - savannah Maba Moubou | -2.51897497 | 12.53195903 | / | 2  | 3  | 2  | 1  | 3  |
| OH6074 | Republic of the Congo | CGmab | Chaillu Congolais - savannah Maba Moubou | -2.51869602 | 12.53199499 | / | 2  | 3  | 2  | 1  | 3  |
| OH6077 | Republic of the Congo | CGmab | Chaillu Congolais - savannah Maba Moubou | -2.51852201 | 12.53213002 | / | 2  | 3  | 2  | 1  | 3  |
| OH6080 | Republic of the Congo | CGmab | Chaillu Congolais - savannah Maba Moubou | -2.51874003 | 12.53256203 | / | 2  | 3  | 2  | 1  | 3  |
| OH6083 | Republic of the Congo | CGmab | Chaillu Congolais - savannah Maba Moubou | -2.51812697 | 12.53286403 | / | 2  | 3  | 2  | 1  | 3  |
| OH6086 | Republic of the Congo | CGmab | Chaillu Congolais - savannah Maba Moubou | -2.51765901 | 12.53297299 | / | 2  | 3  | 2  | 1  | 3  |
| OH6089 | Republic of the Congo | CGmab | Chaillu Congolais - savannah Maba Moubou | -2.517427   | 12.53301398 | / | 2  | 3  | 2  | 1  | 3  |
| OH6092 | Republic of the Congo | CGmab | Chaillu Congolais - savannah Maba Moubou | -2.517312   | 12.53337901 | / | 2  | 3  | 2  | 1  | 3  |
| OH6095 | Republic of the Congo | CGmab | Chaillu Congolais - savannah Maba Moubou | -2.51677598 | 12.53415098 | / | 2  | 3  | 2  | 1  | 3  |
| OH6098 | Republic of the Congo | CGmab | Chaillu Congolais - savannah Maba Moubou | -2.51646099 | 12.53414998 | / | 2  | 3  | 2  | 1  | 3  |
| OH6101 | Republic of the Congo | CGmab | Chaillu Congolais - savannah Maba Moubou | -2.51605103 | 12.53446698 | / | 2  | 3  | 2  | 1  | 3  |
| OH6104 | Republic of the Congo | CGmab | Chaillu Congolais - savannah Maba Moubou | -2.51566404 | 12.53449397 | / | 2  | 3  | 2  | 1  | 3  |
| OH6107 | Republic of the Congo | CGmab | Chaillu Congolais - savannah Maba Moubou | -2.51554702 | 12.53474199 | / | 2  | 3  | 2  | 1  | 3  |

|         |                       |       |                                          |             |             |   |   |   |   |   |   |
|---------|-----------------------|-------|------------------------------------------|-------------|-------------|---|---|---|---|---|---|
| OH6110  | Republic of the Congo | CGmab | Chaillu Congolais - savannah Maba Moubou | -2.51498904 | 12.53496696 | / | 2 | 3 | 2 | 1 | 3 |
| OH6113  | Republic of the Congo | CGmab | Chaillu Congolais - savannah Maba Moubou | -2.51466399 | 12.534931   | / | 2 | 3 | 2 | 1 | 3 |
| OH6116  | Republic of the Congo | CGmab | Chaillu Congolais - savannah Maba Moubou | -2.51455897 | 12.53486998 | / | 2 | 3 | 2 | 1 | 3 |
| OH6118B | Republic of the Congo | CGmab | Chaillu Congolais - savannah Maba Moubou | -2.51300203 | 12.53639096 | / | 2 | 3 | 2 | 1 | 3 |
| OH6122  | Republic of the Congo | CGmab | Chaillu Congolais - savannah Maba Moubou | -2.51293497 | 12.53633103 | / | 2 | 3 | 2 | 1 | 3 |
| OH6126  | Republic of the Congo | CGmab | Chaillu Congolais - savannah Maba Moubou | -2.51287102 | 12.53625702 | / | 2 | 3 | 2 | 1 | 3 |
| OH6129  | Republic of the Congo | CGmab | Chaillu Congolais - savannah Maba Moubou | -2.51272098 | 12.53638401 | / | 2 | 3 | 2 | 1 | 3 |
| OH6132  | Republic of the Congo | CGmab | Chaillu Congolais - savannah Maba Moubou | -2.51251202 | 12.53632299 | / | 2 | 3 | 2 | 1 | 3 |
| OH6135  | Republic of the Congo | CGmab | Chaillu Congolais - savannah Maba Moubou | -2.51229702 | 12.53644    | / | 2 | 3 | 2 | 1 | 3 |
| OH6138  | Republic of the Congo | CGmab | Chaillu Congolais - savannah Maba Moubou | -2.51186603 | 12.53671601 | / | 2 | 3 | 2 | 1 | 3 |
| OH6141  | Republic of the Congo | CGmab | Chaillu Congolais - savannah Maba Moubou | -2.51316397 | 12.53799702 | / | 2 | 3 | 2 | 1 | 3 |
| OH6144  | Republic of the Congo | CGmab | Chaillu Congolais - savannah Maba Moubou | -2.51310898 | 12.53776803 | / | 2 | 3 | 2 | 1 | 3 |
| OH6147  | Republic of the Congo | CGmab | Chaillu Congolais - savannah Maba Moubou | -2.51303698 | 12.53760198 | / | 2 | 3 | 2 | 1 | 3 |
| OH6150  | Republic of the Congo | CGmab | Chaillu Congolais - savannah Maba Moubou | -2.51319003 | 12.53719697 | / | 2 | 3 | 2 | 1 | 3 |
| OH6153  | Republic of the Congo | CGmab | Chaillu Congolais - savannah Maba Moubou | -2.51775398 | 12.53411402 | / | 2 | 3 | 2 | 1 | 3 |
| OH6156  | Republic of the Congo | CGmab | Chaillu Congolais - savannah Maba Moubou | -2.51791298 | 12.53380104 | / | 2 | 3 | 2 | 1 | 3 |
| OH6158  | Republic of the Congo | CGmab | Chaillu Congolais - savannah Maba Moubou | -2.51951703 | 12.53326401 | / | 2 | 3 | 2 | 1 | 3 |
| OH6160  | Republic of the Congo | CGmab | Chaillu Congolais - savannah Maba Moubou | -2.51893499 | 12.53257703 | / | 2 | 3 | 2 | 1 | 3 |
| OH6161  | Republic of the Congo | CGmou | Chaillu Congolais - Moungoundou-Sud      | -2.67075799 | 12.67339996 | / | 2 | 3 | 2 | 1 | 3 |
| OH6162  | Republic of the Congo | CGmou | Chaillu Congolais - Moungoundou-Sud      | -2.67075799 | 12.67339996 | / | 2 | 3 | 2 | 1 | 3 |
| OH6163  | Republic of the Congo | CGmou | Chaillu Congolais - Moungoundou-Sud      | -2.66769097 | 12.67175803 | / | 2 | 3 | 2 | 1 | 3 |
| OH6164  | Republic of the Congo | CGmou | Chaillu Congolais - Moungoundou-Sud      | -2.66769097 | 12.67175803 | / | 2 | 3 | 2 | 1 | 3 |

|        |                       |       |                                    |             |             |   |    |    |    |    |    |
|--------|-----------------------|-------|------------------------------------|-------------|-------------|---|----|----|----|----|----|
| OH6165 | Republic of the Congo | CGmou | Chaillu Congolais - Mounoundou-Sud | -2.66769097 | 12.67175803 | / | 2  | 3  | 2  | 1  | 3  |
| OH6166 | Republic of the Congo | CGmou | Chaillu Congolais - Mounoundou-Sud | -2.66769097 | 12.67175803 | / | 2  | 3  | 2  | 1  | 3  |
| OH6167 | Republic of the Congo | CGmou | Chaillu Congolais - Mounoundou-Sud | -2.66769097 | 12.67175803 | / | 2  | 3  | 2  | 1  | 3  |
| OH6168 | Republic of the Congo | CGmou | Chaillu Congolais - Mounoundou-Sud | -2.66769097 | 12.67175803 | / | 2  | 3  | 2  | 1  | 3  |
| JM1396 | Rwanda                | RWbig | Nyungwe, Mt Bigugu                 | -2.471617   | 29.2404     | / | na | na | na | na | na |
| JM1397 | Rwanda                | RWbig | Nyungwe, Mt Bigugu                 | -2.465533   | 29.244267   | / | na | na | na | na | na |
| JM1398 | Rwanda                | RWbig | Nyungwe, Mt Bigugu                 | -2.455467   | 29.247833   | / | na | na | na | na | na |
| JM1399 | Rwanda                | RWbig | Nyungwe, Mt Bigugu                 | -2.462833   | 29.2455     | / | na | na | na | na | na |
| JM1400 | Rwanda                | RWbig | Nyungwe, Mt Bigugu                 | -2.46375    | 29.24425    | / | na | na | na | na | na |
| JM1401 | Rwanda                | RWbig | Nyungwe, Mt Bigugu                 | -2.45585    | 29.247767   | / | na | na | na | na | na |
| JM1402 | Rwanda                | RWbig | Nyungwe, Mt Bigugu                 | -2.45675    | 29.247183   | / | na | na | na | na | na |
| JM1403 | Rwanda                | RWbig | Nyungwe, Mt Bigugu                 | -2.452283   | 29.2323     | / | na | na | na | na | na |
| JM1404 | Rwanda                | RWbig | Nyungwe, Mt Bigugu                 | -2.4491     | 29.24915    | / | na | na | na | na | na |
| JM1407 | Rwanda                | RWbig | Nyungwe, Mt Bigugu                 | -2.46985    | 29.2433     | / | na | na | na | na | na |
| JM1409 | Rwanda                | RWbig | Nyungwe, Mt Bigugu                 | -2.45705    | 29.247067   | / | na | na | na | na | na |

**Table S3. Results of ABC demographic inference for *P. latifolius* in Cameroon, using the software DIYABC: prior and posterior distributions of the demographical and historical parameters (graphical representation in Figure 5). Times in year BP and effective sizes in number of individuals.**

| Parameter SCENARIO 1 |                                   | Prior distribution   | Mean         | Mode | q025 | q975 |
|----------------------|-----------------------------------|----------------------|--------------|------|------|------|
| $ta_{3-6}$           | Last demographical changes for CM | Uniform (500-5,000)  | Not retained |      |      |      |
| $tb$                 | Divergence CM pops                | Uniform (500-20,000) |              |      |      |      |

| Parameter SCENARIO 2 |                                   | Prior distribution      | Mean    | Mode    | q025    | q975    |
|----------------------|-----------------------------------|-------------------------|---------|---------|---------|---------|
| $N_3$                | Effective size CMkup at $t_0$     | Uniform (10-2,000)      | 1,210   | 1,180   | 411     | 1,930   |
| $N_4$                | Effective size CMngo at $t_0$     | Uniform (10-2,000)      | 775     | 507     | 191     | 1,760   |
| $N_5$                | Effective size CMoku at $t_0$     | Uniform (10-20,000)     | 8,200   | 4,720   | 2,100   | 18,900  |
| $N_6$                | Effective size CMebo at $t_0$     | Uniform (10-2,000)      | 1,320   | 1,260   | 495     | 1,960   |
| $Na_3$               | Effective size CMkup at $ta$      | Uniform (10-100,000)    | 49,500  | 13,300  | 4,660   | 97,900  |
| $Na_4$               | Effective size CMngo at $ta$      | Uniform (10-100,000)    | 48,600  | 9,190   | 3,740   | 97,300  |
| $Na_5$               | Effective size CMoku at $ta$      | Uniform (10-100,000)    | 29,800  | 4,420   | 2,260   | 91,800  |
| $Na_6$               | Effective size CMebo at $ta$      | Uniform (10-100,000)    | 58,700  | 94,600  | 8,380   | 9,850   |
| $Nb$                 | Effective size CM at $tb$         | Uniform (10-100,000)    | 47,900  | 28,900  | 13,900  | 92,400  |
| $ta_{3-6}$           | Last demographical changes for CM | Uniform (500-100,000)   | 41,00   | 39,100  | 13,500  | 77,000  |
| $tb$                 | Divergence CM pops                | Uniform (500-250,000)   | 153,500 | 169,500 | 52,500  | 245,000 |
| $Mean \mu$           | Mean mutation rate                | Uniform (1.0e-5-1.0e-4) | 4.18e-5 | 2.18e-5 | 1.18e-5 | 9.05e-5 |
| $Mean P$             | Mean coefficient P                | Uniform (0.1-0.3)       | 0.218   | 0.300   | 0.114   | 0.300   |
